# Supplementary material for: Development and differentiability of three brief interventions for risky alcohol use that include varying doses of motivational interviewing
Source: Springer Nature journal article supplement (doi:10.1186/s13722-017-0102-0), 2018-01-24
Supplement: MOESM4 [file 15495012]

# NIAAA Fidelity Checklist

Participant ID: \_\_\_\_\_ Therapist: \_\_\_\_\_

Rater: \_\_\_\_\_ Date: \_\_\_\_\_

## SCREENING

### NIAAA Tasks *(Indicate whether therapist completes each task)*

### Notes

Prescreen: Do you sometimes drink beer, wine, or other alcoholic beverages?  
*(If NO, screening is complete.)* ..... YES NO

Single Question Screen: How many times in the past year have you had 5 (4 for women) or more drinks in a day? ..... YES NO

Gives standard drink description (12oz-beer, 5oz-wine, 1.5oz-80 proof liquor) ..... YES NO

**Is the screening positive? NO**

# NIAAA Fidelity Checklist

**WITHIN RECOMMENDED LIMITS** (NOT APPLICABLE)

**For patients drinking within recommended limits, advise they continue to stay within these limits:**

**Notes**

“Based on your responses, your drinking falls under maximum drinking limits. I recommend you (continue to) stay within these limits which are...” ..... YES NO

For healthy men up to age 65: no more than 4 drinks in a day AND no more than 14 drinks in a week.

**OR**

For healthy women (and healthy men over age 65): no more than 3 drinks in a day AND no more than 7 drinks in a week. .... YES NO

For pregnant women: no alcohol consumption. .... YES NO  
NOT APPLICABLE

For those who have a chronic medical condition exacerbated by alcohol: no alcohol consumption. .... YES NO

For those who take medications that interact with alcohol: no alcohol consumption..... YES NO

**Advise**: “Keep in mind that we are here and open to talking about alcohol use or any (related health) concerns that may arise in the future.” ..... YES NO

**Is the screening positive? YES**

# NIAAA Fidelity Checklist

## MORE THAN RECOMMENDED LIMITS

(NOT APPLICABLE)

**For patients drinking more than recommended limits.** *(Scaling Questions)*

**Notes**

Assess Risk:

**Frequency** (how many days in a week?) ..... YES NO

---

Assess Risk:

**Quantity** (how many drinks per day?) ..... YES NO

---

Assess for Alcohol Use Disorder (AUD):

Abuse, Dependence (**Drinking more than intended**) ..... YES NO

---

Assess for AUD:

Abuse, Dependence (**Risk bodily harm**) ..... YES NO

---

Assess AUD further if either of the last 2 questions was positive, NA if last two questions were negative. .... YES NO

NOT APPLICABLE

# NIAAA Fidelity Checklist

## BRIEF INTERVENTION

| AUD Positive                                                                                          |     |    | (NOT APPLICABLE) |  |  | AUD Negative                                                                              |     |    | (NOT APPLICABLE) |  |  |
|-------------------------------------------------------------------------------------------------------|-----|----|------------------|--|--|-------------------------------------------------------------------------------------------|-----|----|------------------|--|--|
| State "I believe you have an AUD." .....                                                              | YES | NO |                  |  |  | State you are drinking more than is medically safe. ....                                  | YES | NO |                  |  |  |
| "I recommend you quit drinking and I'm willing to help." .....                                        | YES | NO |                  |  |  | State recommended drinking limits .....                                                   | YES | NO |                  |  |  |
| Relate to patient's concerns and medical findings if present. ....                                    | YES | NO |                  |  |  | State 72% of (or most) adults never exceed these limits.....                              | YES | NO |                  |  |  |
| NOT APPLICABLE                                                                                        |     |    |                  |  |  | State risk for developing AUD .....                                                       | YES | NO |                  |  |  |
| State "Let's come up with a plan. Abstaining is the safest course for most patients with AUDs." ..... | YES | NO |                  |  |  | Daily consequences (accidents, family, education, work, money problems) .....             | YES | NO |                  |  |  |
| Explain referral options.....                                                                         | YES | NO |                  |  |  | Weekly consequences (liver, gastrointestinal disease, high blood pressure, cancers) ..... | YES | NO |                  |  |  |
| Ask "Which of these options would you like to pursue?" .....                                          | YES | NO |                  |  |  | State "I recommend you cut down and I'm willing to help." .....                           | YES | NO |                  |  |  |
| Make appropriate referrals or provide Strategies for Cutting Down sheet. ....                         | YES | NO |                  |  |  | Ask "Are you willing to consider making changes to your drinking?" .....                  | YES | NO |                  |  |  |
| Acknowledge that change is difficult and encourage follow-up. ....                                    | YES | NO |                  |  |  |                                                                                           |     |    |                  |  |  |

**For risky drinking patients, are they ready to make a change?**

# NIAAA Fidelity Checklist

## READINESS

| Not Ready                                                                                                        |     | (NOT APPLICABLE) |                                                                                                                                  | Ready |    | (NOT APPLICABLE) |  |
|------------------------------------------------------------------------------------------------------------------|-----|------------------|----------------------------------------------------------------------------------------------------------------------------------|-------|----|------------------|--|
| State "Ok, I'd like to restate that I am concerned about your health." .....                                     | YES | NO               | "Great. Let's set a goal to cut down within maximum limits." .....                                                               | YES   | NO |                  |  |
| State "Tell me a little about what you like about drinking versus your reasons for cutting down." .....          | YES | NO               | State "We'll agree on a plan regarding what specific steps you are going to take." .....                                         | YES   | NO |                  |  |
| State, "Ok, what are the major barriers to change?" .....                                                        | YES | NO               | "So let's think about:<br>• What specific steps are you going to take? .....                                                     | YES   | NO |                  |  |
| State "Great, if you decide to change, you can contact the behavioral health specialist at the clinic." .....    | YES | NO               | • How are you going to track your drinking? .....                                                                                | YES   | NO |                  |  |
| State "Keep in mind that your doctor is here and willing to help if you decide you want to make a change." ..... | YES | NO               | • How are you going to manage high risk situations? .....                                                                        | YES   | NO |                  |  |
|                                                                                                                  |     |                  | • Who might be willing to help you?" .....                                                                                       | YES   | NO |                  |  |
|                                                                                                                  |     |                  | Allow response. ....                                                                                                             | YES   | NO |                  |  |
|                                                                                                                  |     |                  | Give Strategies for Cutting Down sheet and paraphrase. ....                                                                      | YES   | NO |                  |  |
|                                                                                                                  |     |                  | State "You can check some off to try the first week and add some others the next week. Which would you like to try first?" ..... | YES   | NO |                  |  |
|                                                                                                                  |     |                  | State "Great, I encourage you to follow-up with your doctor with questions ... ..                                                | YES   | NO |                  |  |
|                                                                                                                  |     |                  | ...or if you have trouble sticking to your plan" .....                                                                           | YES   | NO |                  |  |

# NIAAA Fidelity Checklist

## FIDELITY INCONSISTENCIES

(LIST STATEMENTS OR QUESTIONS THAT VEER FROM THE PROTOCOL)

1

---

2

---

3

---

4

---

5

---

**Total Inconsistencies:** \_\_\_\_\_
