# Supplementary material for: Development and differentiability of three brief interventions for risky alcohol use that include varying doses of motivational interviewing
Source: Springer Nature journal article supplement (doi:10.1186/s13722-017-0102-0), 2018-01-24
Supplement: MOESM5 [file 15495012]

# Brief Advice Fidelity Checklist

Participant ID: \_\_\_\_\_ Therapist: \_\_\_\_\_

Rater: \_\_\_\_\_ Date: \_\_\_\_\_

## SCREENING

### Brief Advice Tasks *(Indicate whether therapist completes each task)*

### Notes

Prescreen: Do you sometimes drink beer, wine, or other alcoholic beverages?  
*(If NO, screening is complete)* ..... YES NO

Single Question Screen: How many times in the past year have you had 5 (4 for women) or more drinks in a day? ..... YES NO

Gives standard drink description  
(12oz-beer, 5oz-wine, 1.5oz-80 proof liquor) ..... YES NO

Is the ISA screening positive? **NO**

# Brief Advice Fidelity Checklist

**WITHIN RECOMMENDED LIMITS** (NOT APPLICABLE)

**For patients drinking within recommended limits, advise they continue to stay within these limits:**

**Notes**

“Based on your responses, your drinking falls under maximum drinking limits. I recommend you (continue to) stay within these limits which are...” ..... YES NO

For healthy men up to age 65: no more than 4 drinks in a day AND no more than 14 drinks in a week.

**OR**

For healthy women (and healthy men over age 65): no more than 3 drinks in a day AND no more than 7 drinks in a week. .... YES NO

For pregnant women: no alcohol consumption. .... YES NO  
NOT APPLICABLE

For those who have a chronic medical condition exacerbated by alcohol: no alcohol consumption. .... YES NO

For those who take medications that interact with alcohol: no alcohol consumption..... YES NO

**Advise**: “Keep in mind that we are here and open to talking about alcohol use or any (related health) concerns that may arise in the future.” ..... YES NO

**Is the screening positive? YES**

# Brief Advice Fidelity Checklist

## MORE THAN RECOMMENDED LIMITS

(NOT APPLICABLE)

**For patients drinking more than recommended limits.** *(Screening Questions)*

**Notes**

Assess Risk:

**Frequency** (how many days in a week?) ..... YES NO

---

Assess Risk:

**Quantity** (how many drinks per day?) ..... YES NO

---

Assess for Alcohol Use Disorder (AUD):

Abuse, Dependence (**Drinking more than intended**) ..... YES NO

---

Assess for AUD:

Abuse, Dependence (**Risk bodily harm**) ..... YES NO

---

Assess AUD further if either of the last 2 questions was positive, NA if last two questions were negative. .... YES NO

NOT APPLICABLE

# Brief Advice Fidelity Checklist

## BRIEF INTERVENTION

| AUD Positive (NOT APPLICABLE)                                         |     |    | AUD Negative (NOT APPLICABLE)                                                                                            |     |    |
|-----------------------------------------------------------------------|-----|----|--------------------------------------------------------------------------------------------------------------------------|-----|----|
| State "I believe you have an AUD." .....                              | YES | NO | State "Based on your responses, you are, your alcohol consumption exceeds the maximum recommended drinking limits" ..... | YES | NO |
| "I recommend you quit drinking." .....                                | YES | NO | State recommended drinking limits .....                                                                                  | YES | NO |
| "Abstaining is the safest course for most patients with AUDs." .....  | YES | NO | State 72% of (or most) adults never exceed these limits .....                                                            | YES | NO |
| Explain referral options.....                                         | YES | NO | Daily consequences (accidents, family, education, work, money problems) .....                                            | YES | NO |
| Ask "Which of these options would you like to pursue?" .....          | YES | NO | Weekly consequences (liver, gastrointestinal disease, high blood pressure, cancers) .....                                | YES | NO |
| Make appropriate referrals or state strategies for cutting down. .... | YES | NO | State risk for developing AUD .....                                                                                      | YES | NO |
| Encourage follow-up. ....                                             | YES | NO | State "I recommend you cut down and I'm willing to help." .....                                                          | YES | NO |
|                                                                       |     |    | Give Strategies for Cutting Down sheet and summarize the sheet.....                                                      | YES | NO |
|                                                                       |     |    | Give referral information.....                                                                                           | YES | NO |
|                                                                       |     |    | Ask if they have questions .....                                                                                         | YES | NO |

# Brief Advice Fidelity Checklist

## FIDELITY INCONSISTENCIES

(LIST STATEMENTS OR QUESTIONS THAT VEER FROM THE PROTOCOL)

1

---

2

---

3

---

4

---

5

---

**Total Inconsistencies:** \_\_\_\_\_
